# Supplementary material for: Eco-Friendly Sustainable Nanocarriers to Treat Oxidative Stresses and Skin Aging-Related Ailments, Valorization of a By-Product
Source: MDPI journal article supplement (doi:10.3390/bioengineering10070798), 2023-07-03
Supplement: s1 [file s1]

## Supporting Information's

### Eco-Friendly Sustainable Nanocarriers to Treat Oxidative Stresses and Skin Aging-related Ailments, Valorization of a By-product

Zaheer Ullah Khan<sup>1</sup>, Taous Khan<sup>1</sup>, Hira Khan<sup>2</sup>, Naveed Ullah Khan<sup>3</sup>, Yang Ding<sup>4</sup>, Atif Ali<sup>1\*</sup>, and Jiang Ni<sup>5\*</sup>

<sup>1</sup> Department of Pharmacy, COMSATS University Islamabad, Abbottabad Campus, Abbottabad, Pakistan; zaheerkhan2092@gmail.com (Z.U.K), taouskhan@cuiatd.edu.pk (T.K), atifali@cuiatd.edu.pk (A.A)

<sup>2</sup> Department of Pharmacy, Abbottabad University of Science and Technology, Abbottabad, Pakistan; hirakhan@aust.edu.pk (H.K)

<sup>3</sup> Department of Pharmacy, CECOS University of Engineering and Emerging Sciences, Peshawar, Pakistan; naveedkhan1676@hotmail.com (N.U.K)

<sup>4</sup> College of Pharmacy, Pharmaceutical Series, China Pharmaceutical University, Nanjing 210000, China; dydszyzf@163.com

<sup>5</sup> Department of Pharmacy, Affiliated Hospital of Jiangnan University, Wuxi 214000, P.R. nj1876348@suda.edu.cn (J.N)

\* Correspondence: atifali@cuiatd.edu.pk (A.A), Tel +92-0992-383591-6; nj1876348@suda.edu.cn (J.N), Tel +8613511646862

**Supporting Table S1.** Bioactive compounds found in GC-MS analysis by Nist library in O-Ext

| Hit. | Rev. | For. | Compound Name                            | M.W | M.F.                                                           | CAS. / Lib;<br>Nist. |
|------|------|------|------------------------------------------|-----|----------------------------------------------------------------|----------------------|
| 1    | 810  | 646  | Dodecanoic acid                          | 200 | C <sub>12</sub> H <sub>24</sub> O <sub>2</sub>                 | 143-07-7             |
| 2    | 762  | 681  | Linalool                                 | 154 | C <sub>10</sub> H <sub>18</sub> O                              | 78-70-6              |
| 3    | 739  | 535  | Alpha.-terpineol                         | 154 | C <sub>10</sub> H <sub>18</sub> O                              | 98-55-5              |
| 4    | 862  | 691  | Hentriacontane                           | 436 | C <sub>31</sub> H <sub>64</sub>                                | 630-04-6             |
| 5    | 838  | 435  | Cyclohexasiloxane, dodecamethyl          | 444 | C <sub>12</sub> H <sub>36</sub> O <sub>6</sub> Si <sub>6</sub> | 540-97-              |
| 6    | 658  | 470  | Heptadecane, 1-bromo                     | 318 | C <sub>17</sub> H <sub>35</sub> Br                             | 3508-00-7            |
| 9    | 666  | 424  | L-norvaline, n-(2-methoxyethoxycarbonyl) | 443 | C <sub>25</sub> H <sub>49</sub> O <sub>5</sub> N               | 900328-64-7          |
| 10   | 738  | 473  | 2,4-di-tert-butylphenol                  | 206 | C <sub>14</sub> H <sub>22</sub> O                              | 96-76-4              |
| 11   | 801  | 611  | 2,6-octadien-1-ol, 3,7-dimethyl-, propan | 210 | C <sub>13</sub> H <sub>22</sub> O <sub>2</sub>                 | 105-91-9             |
| 12   | 702  | 594  | 5,5-dimethyl-cyclohex-3-en-1-ol          | 126 | C <sub>8</sub> H <sub>14</sub> O                               | 82299-68-1           |
| 13   | 812  | 710  | Benzoic acid, 2-ethylhexyl ester         | 234 | C <sub>15</sub> H <sub>22</sub> O <sub>2</sub>                 | 5444-75-7            |
| 14   | 593  | 370  | Methyl 2-hydroxy-pentacosanoate          | 412 | C <sub>26</sub> H <sub>52</sub> O <sub>3</sub>                 | 118745-42-9          |
| 15   | 873  | 747  | Methyl 11-methyl-dodecanoate             | 228 | C <sub>14</sub> H <sub>28</sub> O <sub>2</sub>                 | 900336-45-1          |
| 16   | 909  | 634  | Tetradecanoic acid, 10,13-dimethyl-, met | 270 | C <sub>17</sub> H <sub>34</sub> O <sub>2</sub>                 | 267650-23-7          |
| 17   | 765  | 640  | Ethyl 14-methyl-hexadecanoate            | 298 | C <sub>19</sub> H <sub>38</sub> O <sub>2</sub>                 | 900336-64-7          |
| 18   | 782  | 715  | N-hexadecanoic acid                      | 256 | C <sub>16</sub> H <sub>32</sub> O <sub>2</sub>                 | 57-10-3              |
| 19   | 795  | 601  | Oleyl oleate                             | 532 | C <sub>36</sub> H <sub>68</sub> O <sub>2</sub>                 | 3687-45-4            |
| 20   | 853  | 718  | Isopropyl linoleate                      | 322 | C <sub>21</sub> H <sub>38</sub> O <sub>2</sub>                 | 22882-95-7           |
| 21   | 785  | 554  | Hentriacontane                           | 436 | C <sub>31</sub> H <sub>64</sub>                                | 630-04-6             |
| 22   | 721  | 561  | 2,6,11-dodecatrienal, 2,6-dimethyl-10-me | 218 | C <sub>15</sub> H <sub>22</sub> O                              | 60066-88-8           |

**Supporting Figure S1.** Selection of Surfactant, Liquid and Solid-lipids and their Compatibility for NLCs Preparation

| Optimization of NLCs | Design of Experiment | Model            | Independent factors        |             |                              |             |                           |             |
|----------------------|----------------------|------------------|----------------------------|-------------|------------------------------|-------------|---------------------------|-------------|
|                      | Stat ease            | Box-Benken model | Amount of solid lipids (%) |             | Amount of lipid mixture (mg) |             | Amount of surfactant (mg) |             |
|                      |                      |                  | Upper limit                | Lower limit | Upper limit                  | Lower limit | Upper limit               | Lower limit |
|                      |                      |                  | 99.9                       | 70          | 600                          | 400         | 800                       | 400         |
|                      |                      |                  | Dependent factors          |             |                              |             |                           |             |
|                      |                      |                  | Size (nm)                  |             | Zetapotential (mV)           |             | PDI                       |             |

**Supporting Table S2.** Composition of independent factors in formulations produced via box-benken model

|     | Dependent factor | Dependent factor | Dependent factor  | Size (nm) | ZP (mV) | PDI  |
|-----|------------------|------------------|-------------------|-----------|---------|------|
| Run | A:lipids (mg)    | B:SL (%)         | C:Surfactants (%) |           |         |      |
| F1  | 500              | 80               | 0.5               | 240       | -25     | 0.8  |
| F2  | 500              | 80               | 1.5               | 250       | -51     | 0.6  |
| F3  | 600              | 89.95            | 1                 | 164.5     | -77.7   | 0.15 |
| F4  | 600              | 99.9             | 1                 | 368       | -59     | 0.78 |
| F5  | 600              | 89.95            | 1.5               | 169.6     | -78.1   | 0.19 |
| F6  | 400              | 99.9             | 1                 | 278       | -35     | 0.56 |
| F7  | 500              | 99.9             | 0.5               | 210       | -37.7   | 0.75 |
| F8  | 500              | 89.95            | 1                 | 160       | -76.8   | 0.23 |
| F9  | 600              | 80               | 1                 | 195       | -47.2   | 0.27 |
| F10 | 500              | 89.95            | 1                 | 157.5     | -78.3   | 0.16 |
| F11 | 500              | 99.9             | 1.5               | 283       | -51     | 0.67 |
| F12 | 400              | 80               | 1                 | 190       | -67     | 0.16 |
| F13 | 400              | 89.95            | 1.5               | 203       | -71     | 0.31 |
| F14 | 400              | 89.95            | 0.5               | 230       | -39     | 0.63 |
| F15 | 500              | 89.95            | 1                 | 201       | -75     | 0.21 |

**Supporting Table S3.** Suggested independent and dependent factors by BB model

|                  | Size (nm)      | ZP (mV)      | PDI         | Desirability |
|------------------|----------------|--------------|-------------|--------------|
| Predicted values | 183.85 ± 15.44 | -78.0 ± 3.34 | 0.18 ± 0.06 | 0.97         |
| Actual results   | 164.5          | -77.7 ± 5.57 | 0.15±       | Actual       |

### 1.1.1 Statistical analysis of selected models

#### 1.1.1.1 Dependent factor size (nm)

The model is suggested to be significant by the model's F-value of 7.8 and only 0.68% of noise possible. P-values less than 0.05 indicates that model terms are significant. In this case B, B<sup>2</sup> are significant model terms. The Lack of Fit F-value of 3.16 indicates that Lack of Fit is not significant relative to the pure error and non-significant lack of fit is considered good as the model should to fit.

#### 1.1.1.2 Dependent factor ZP (mV)

The Model F-value of 19.81 shows that model is significant with only a 0.02% chance of noise. On the basis of P-value (< 0.05) the model terms are significant. In this case C, AB, B<sup>2</sup>, C<sup>2</sup> are significant model terms. The Lack of Fit F-value of 17.77 implies there is a 5.42% chance that a Lack of Fit F-value this large could occur due to noise.

#### 1.1.1.3 Dependent factor PDI

The Model F-value of 11.07 suggests that model is significant with only a 0.11% chance of noise. P-values less than 0.05 indicate model terms are significant. In this case B, C, B<sup>2</sup>, C<sup>2</sup> are significant model terms. The Lack of Fit F-value of 15.96 implies there is a 6.03% chance that a Lack of Fit F-value this large could occur due to noise.

## **Supplementary Figure S2. Written consent sample**

### **Written consent sample**

**COMSATS UNIVERSITY ISLAMABAD, ABBOTTABAD CAMPUS  
CONSENT TO PARTICIPATE IN RESEARCH STUDY  
Short Form Written Consent (used with oral consent form)**

**STUDY TITLE:** “Complete Skin Investigation of -*Citrus Sinensis* Extract Loaded Nano-lipid Carriers Sustainable Topical Formulation” on skin of volunteers in Population of Abbottabad; Valorization of a by-product

**Principle Investigator:** Dr. Atif Ali

**Investigator:** Zaheer Ullah Khan

### **WRITTEN CONSENT**

I confirm that the researcher has explained the elements of informed consent to the participant. The subject knows that their participation is voluntary, and that they do not need to answer all questions. The purpose of the research as well as the risks and benefits have been explained. The procedures as well as the time commitment have been outlined. The participant understands issues of confidentiality.

**Participant name** \_\_\_\_\_

**Participant signature**\_\_\_\_\_
